# Supplementary material
Source: PubMed Central journal article supplement (PMC7904580)

**No acceptor**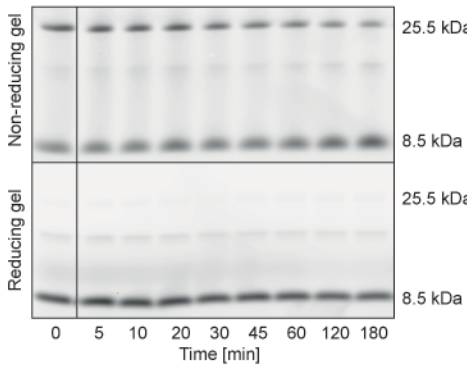**L-Lysine**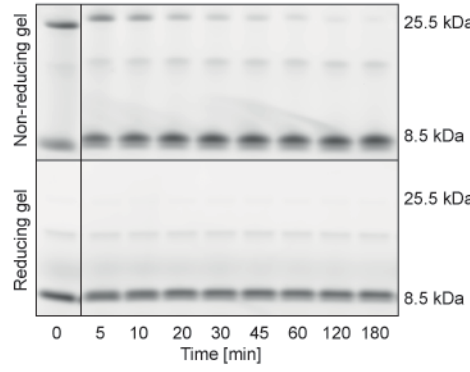**D-Lysine**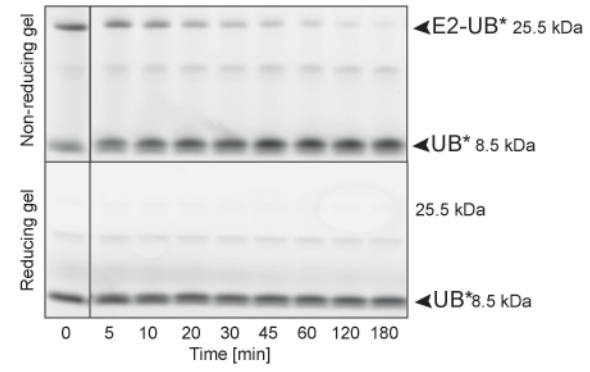**N $\alpha$ -acetyl-L-Lysine**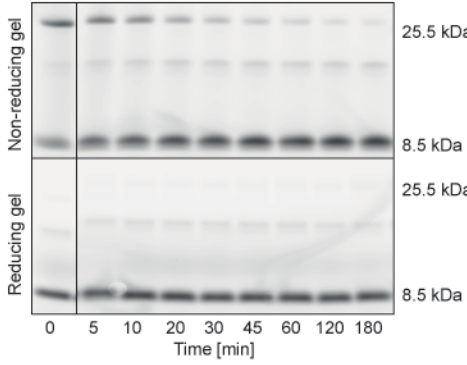**N $\epsilon$ -acetyl-L-Lysine**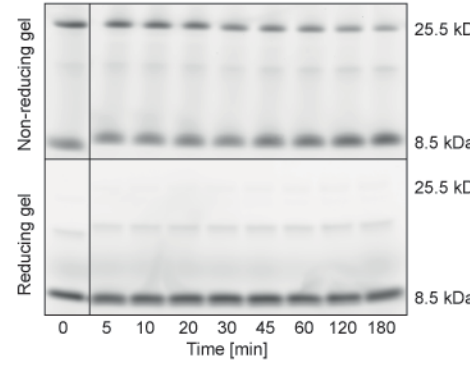**N $\alpha$ -acetyl-L-Ornithine**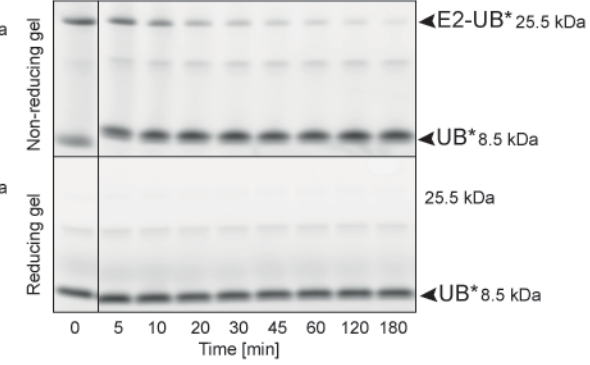**Dap**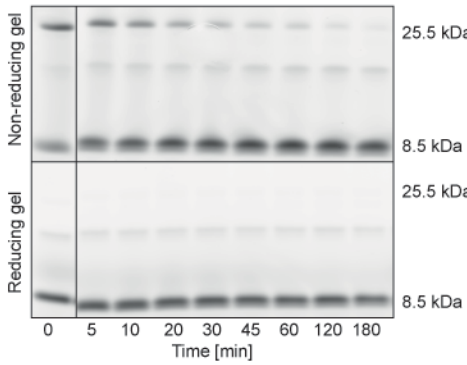**Homolysine**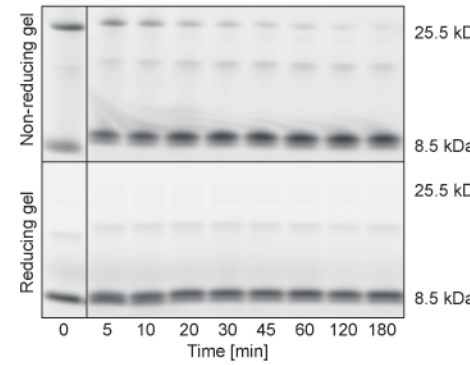**L-Serine**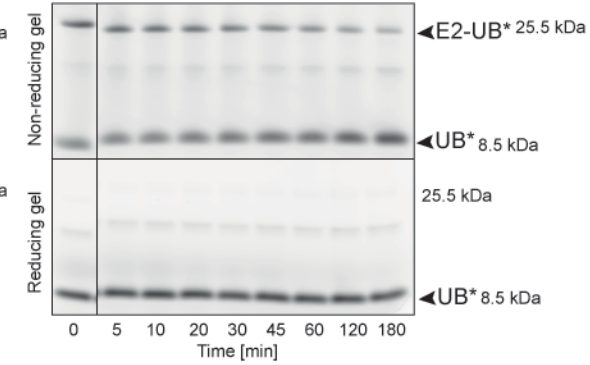

Figure 1b

Extended Data Figure 1b-c

Non-reducing gels

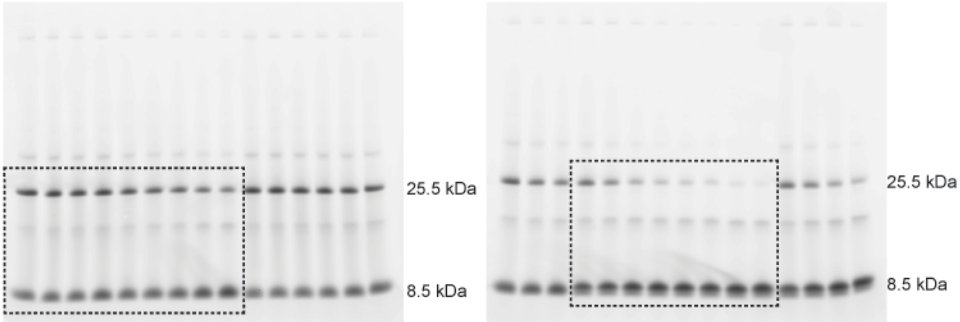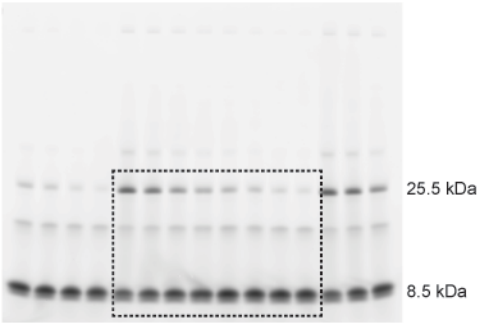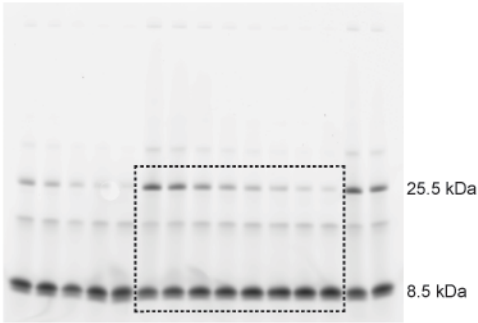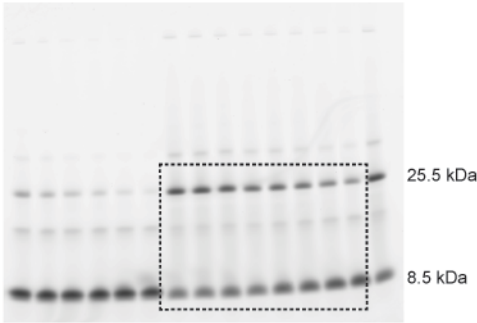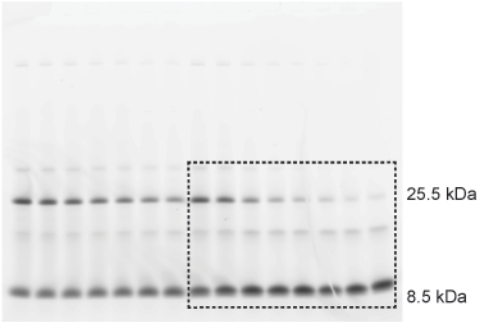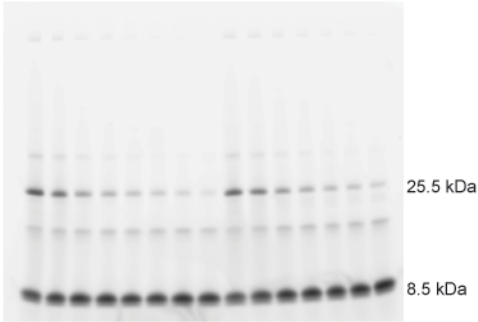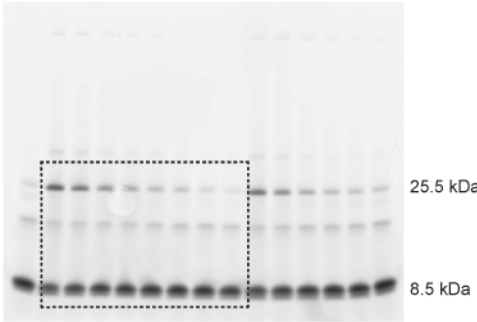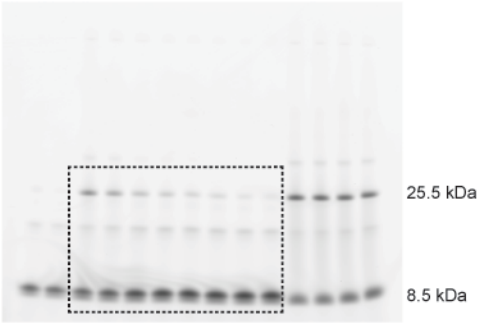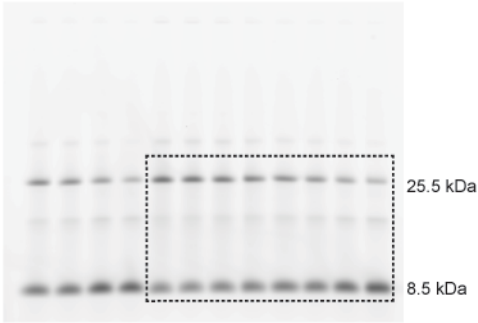

Figure 1b

Extended Data Figure 1b

Reducing gels

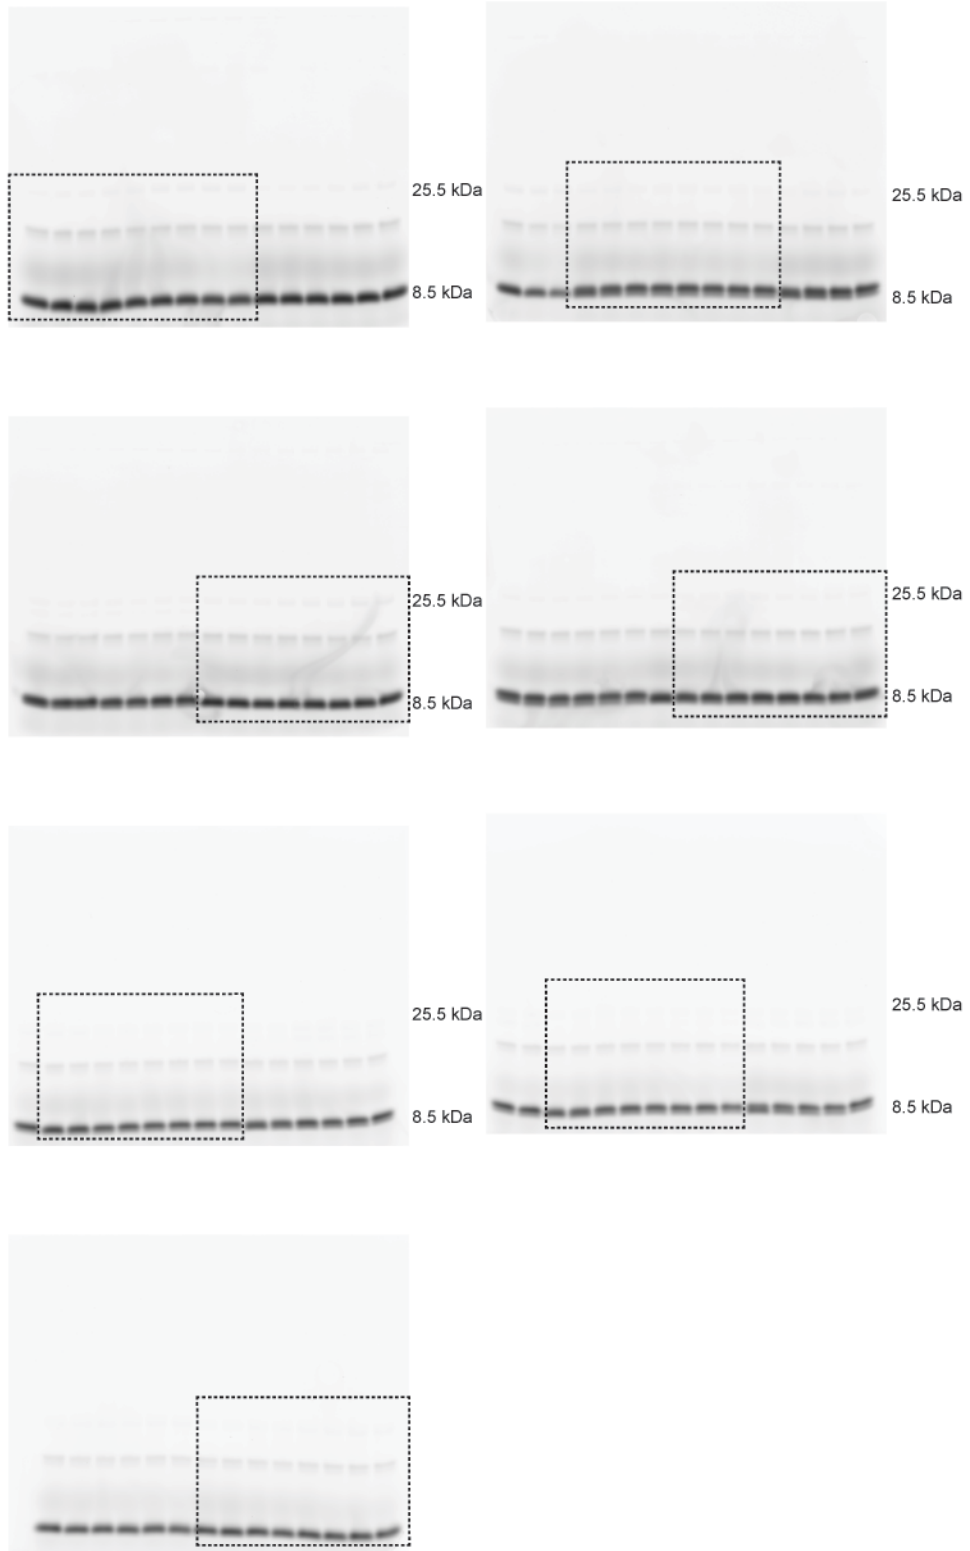

Supplement: NIHMS1637639-supplement-1637639_SourceData_Fig1.pdf [file NIHMS1637639-supplement-1637639_SourceData_Fig1.pdf]
