# Supplementary material
Source: PubMed Central journal article supplement (PMC7904580)

# UB K63 acceptor mutants

## UBE2N/UBE2V1

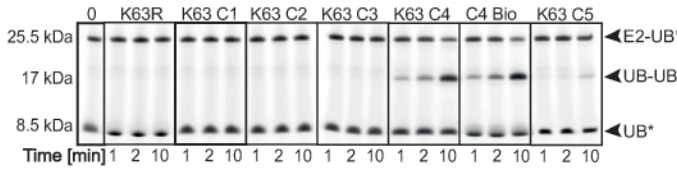

## UBE2N/UBE2V1+RNF4

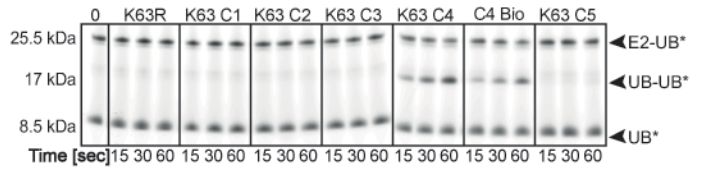

# UB K48 acceptor mutants

## UBE2R2

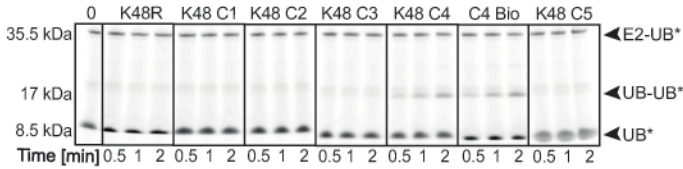

## UBE2G1

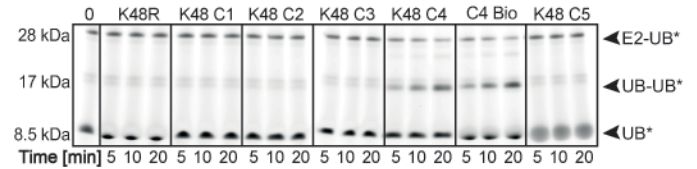

## UBE2R2+NEDD8-CRL1

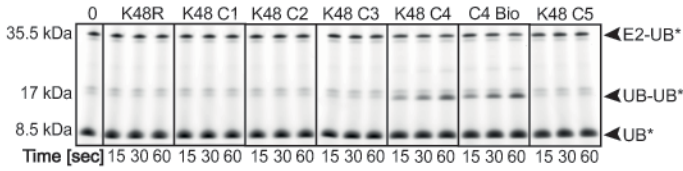

## UBE2G1+NEDD8-CRL4

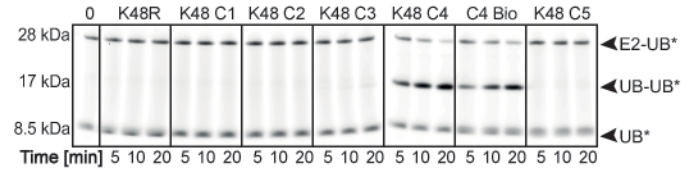

## UBE2R2+NEDD8-CRL1<sup>FBW7</sup>

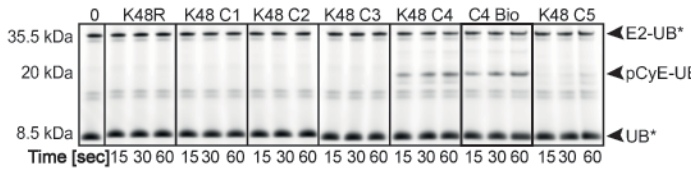

## UBE2G1+NEDD8-CRL4<sup>CRBN</sup>

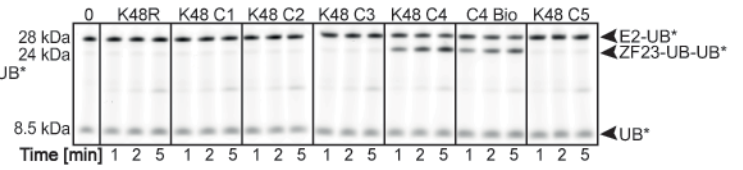

Figure 2c upper panel

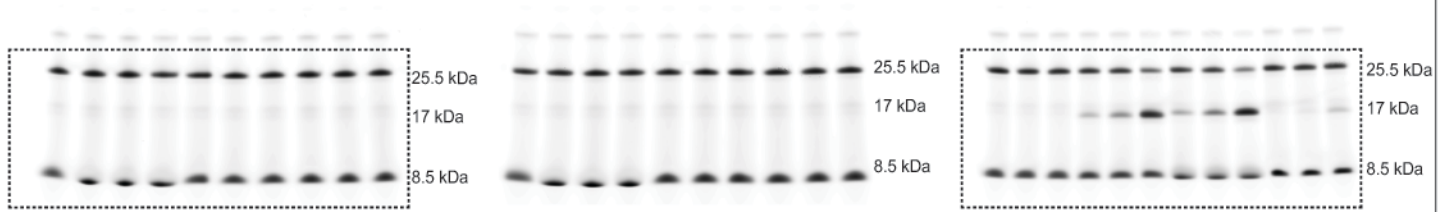

Figure 2c lower panel

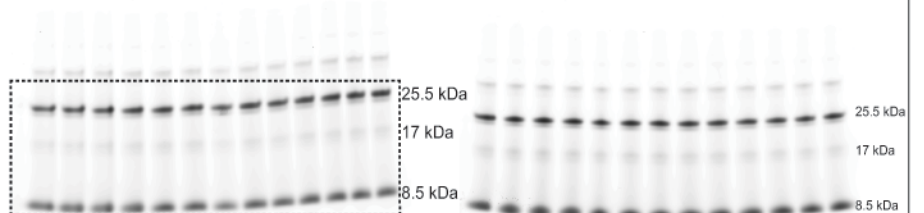

Figure 2d upper right panel

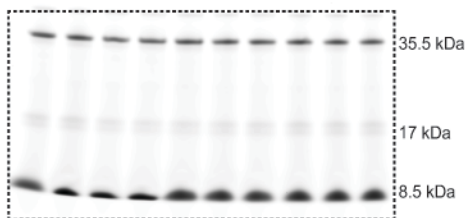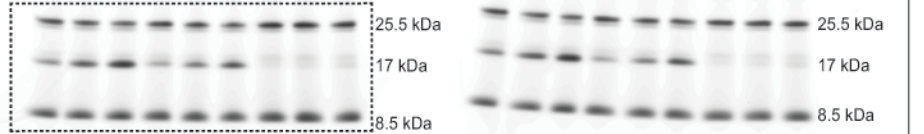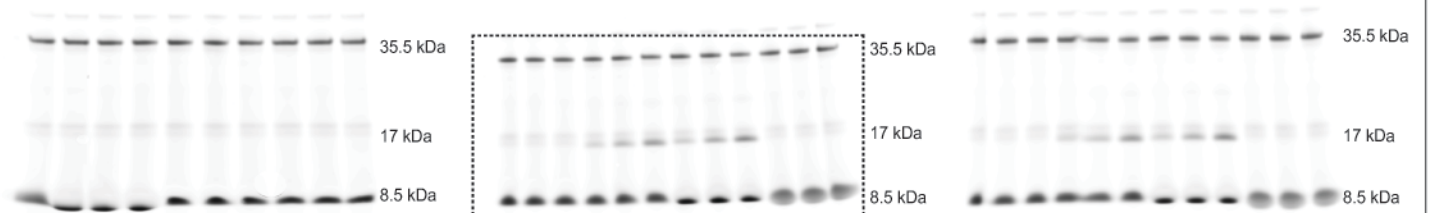

Figure 2d middle right panel

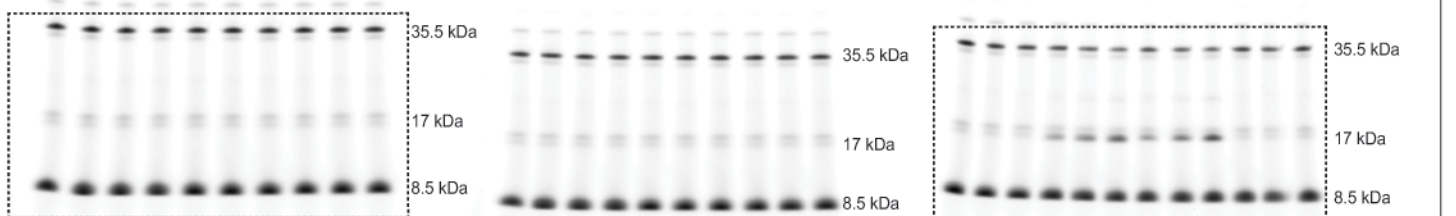

Figure 2d middle right panel

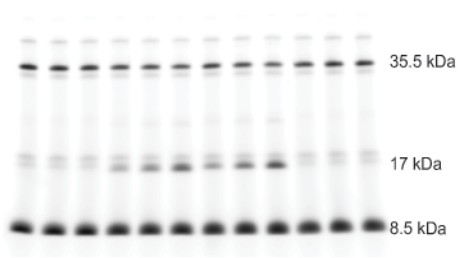

Figure 2d lower right panel

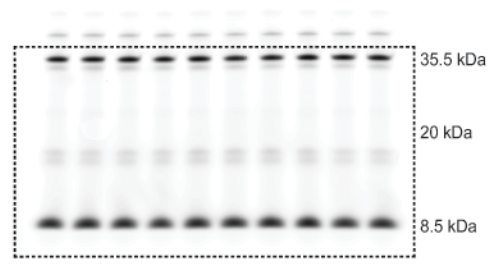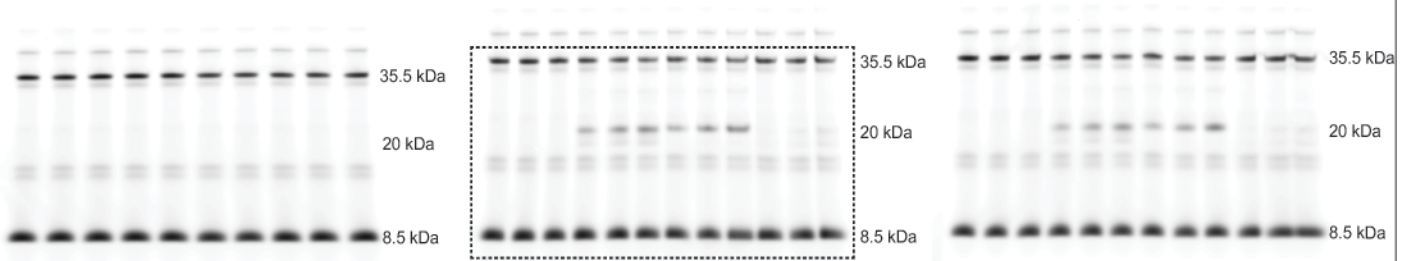

Figure 2d upper left panel

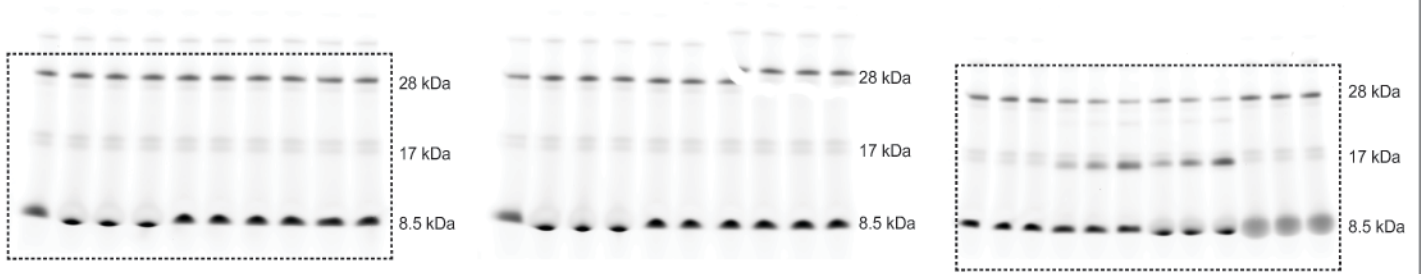

Figure 2d middle left panel

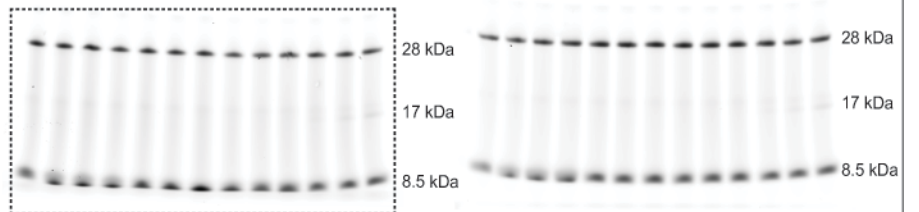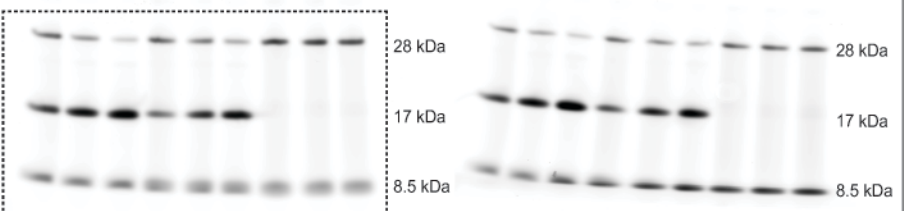

Figure 2d lower left panel

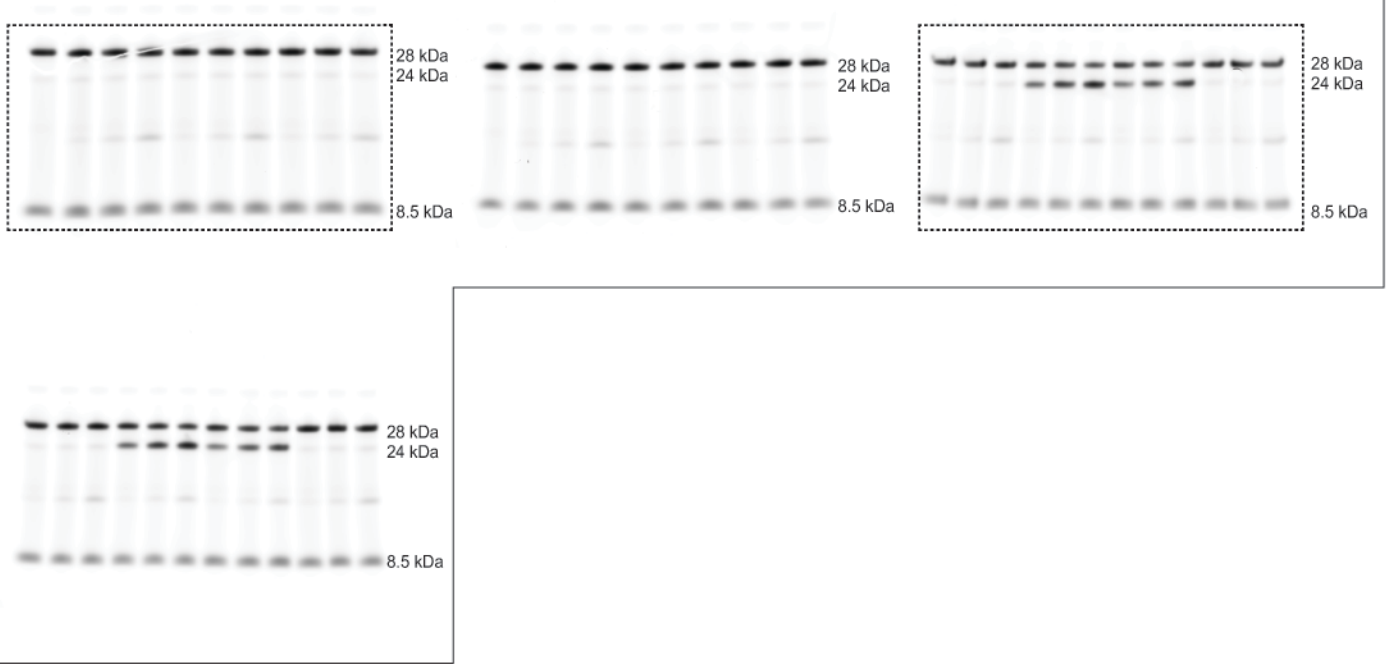

Supplement: NIHMS1637639-supplement-1637639_SourceData_Fig2.pdf [file NIHMS1637639-supplement-1637639_SourceData_Fig2.pdf]
