# Supplementary material
Source: PubMed Central journal article supplement (PMC7904580)

### UBE2G1

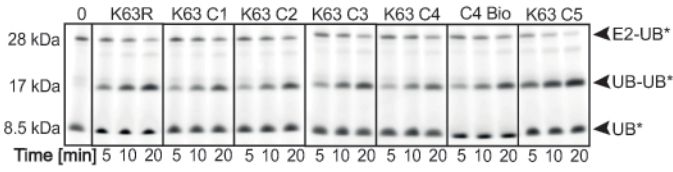

### UBE2G1+NEDD8-CRL4

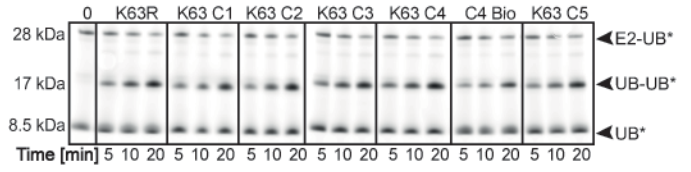

### UBE2N/UBE2V1

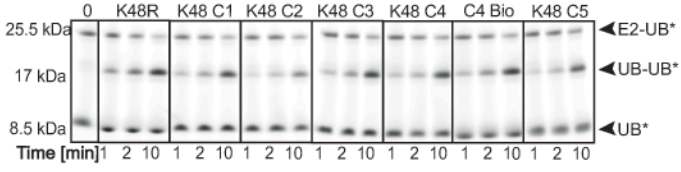

### UBE2N/UBE2V1+RNF4

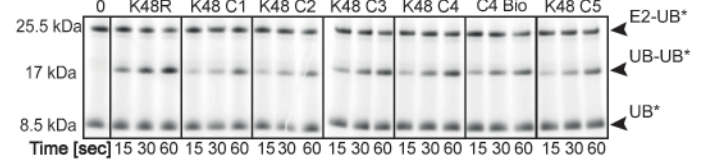

## Extended Data Figure 2a

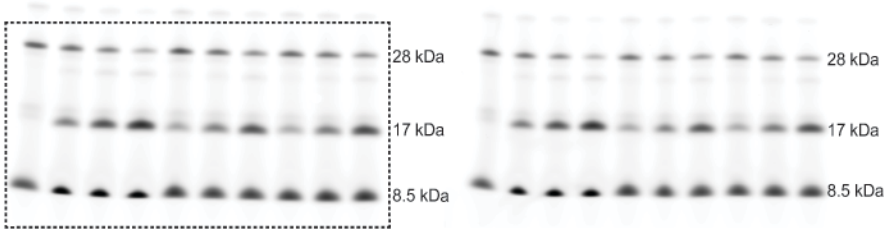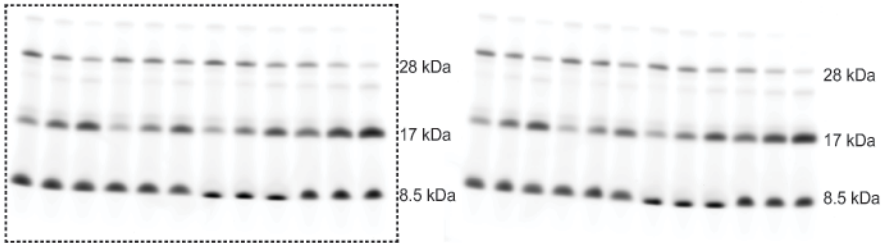

## Extended Data Figure 2a

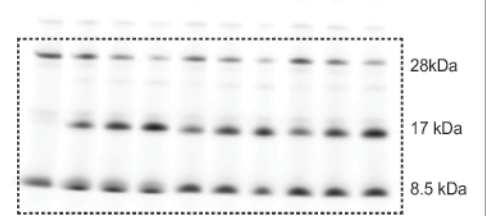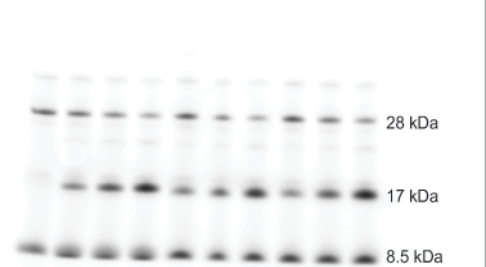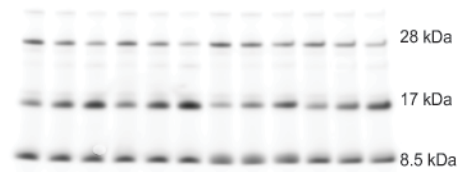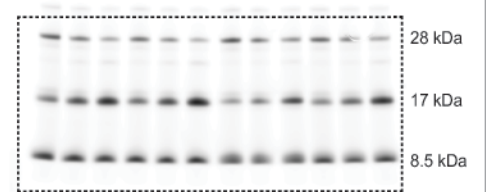

# Extended Data Figure 2b

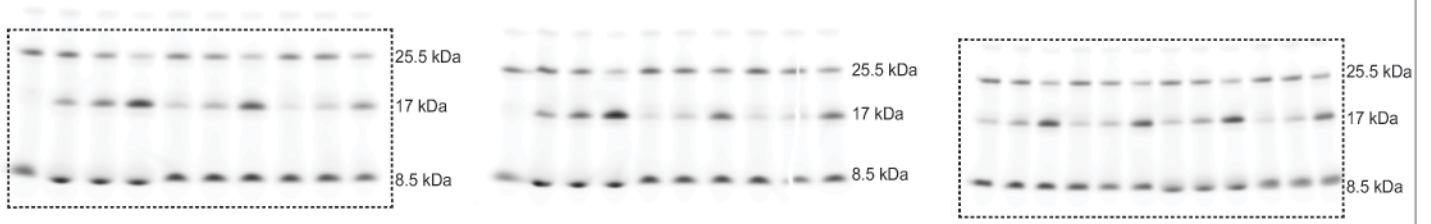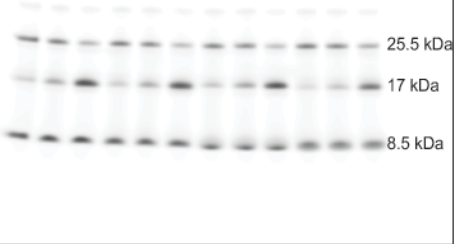

# Extended Data Figure 2b

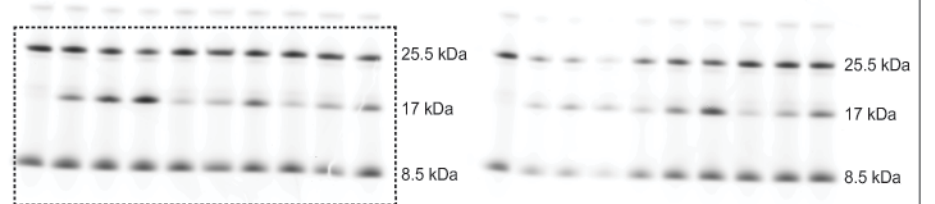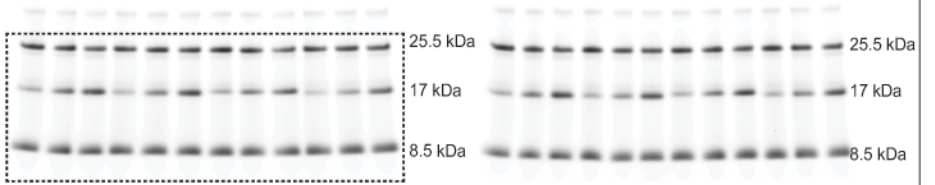

Supplement: NIHMS1637639-supplement-1637639_SourceData_ExtData_Fig2.pdf [file NIHMS1637639-supplement-1637639_SourceData_ExtData_Fig2.pdf]
