# Supplementary material
Source: PubMed Central journal article supplement (PMC7904580)

### Extended Data Figure 4a

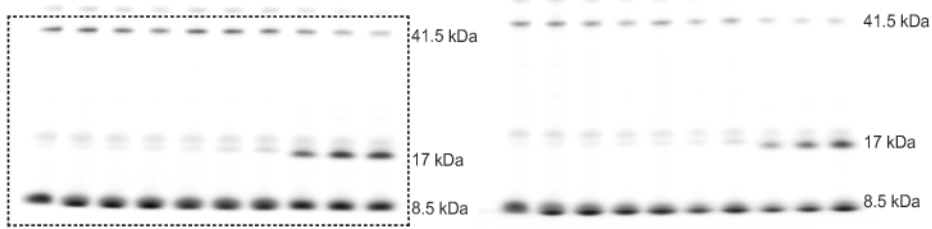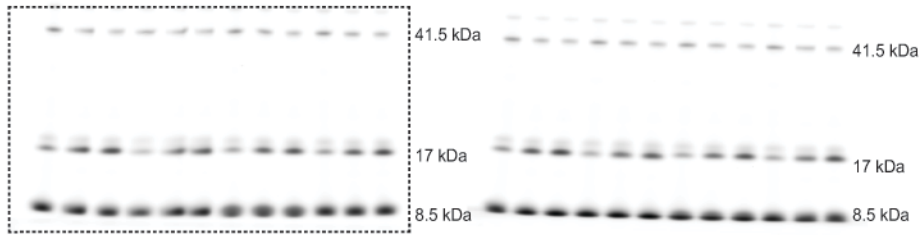

### Extended Data Figure 4b

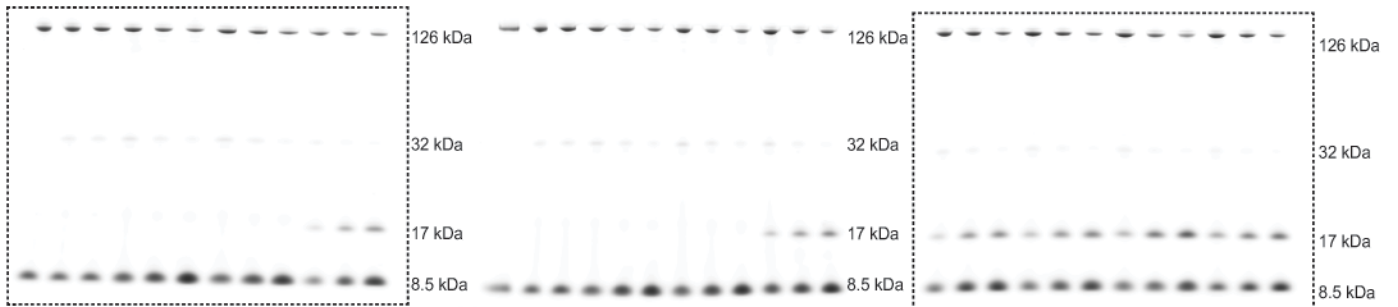

### Extended Data Figure 4c

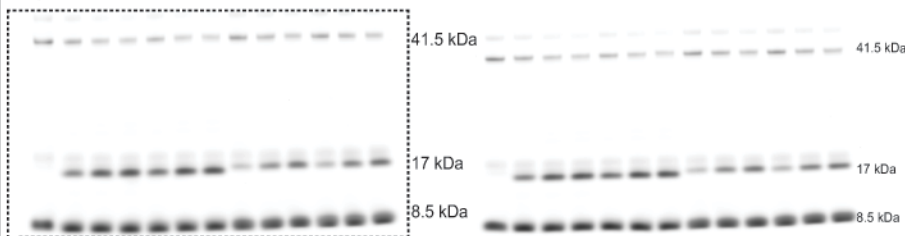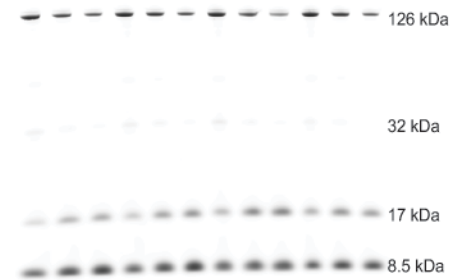

Extended Data Figure 4d

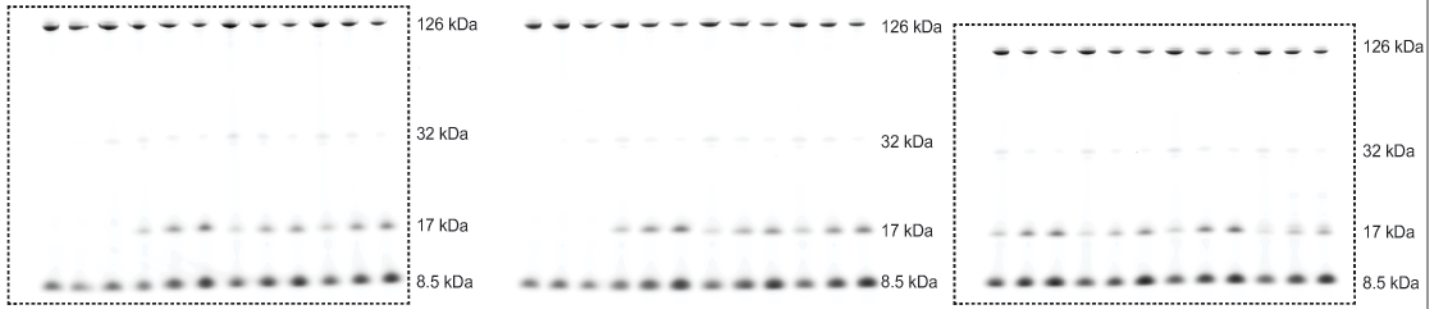

Extended Data Figure 4e

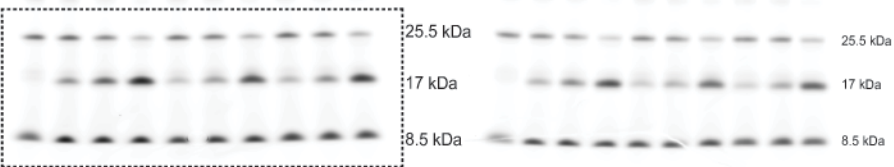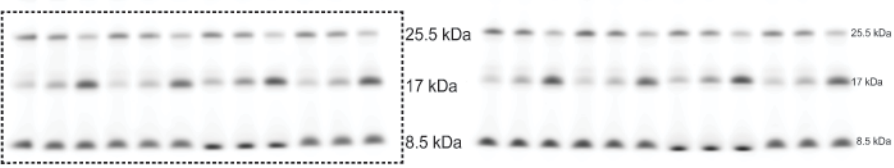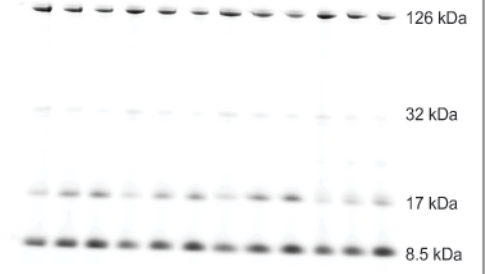

Extended Data Figure 4f

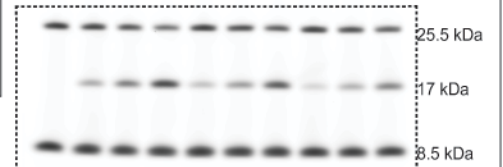

Not used in this study

Not used in this study

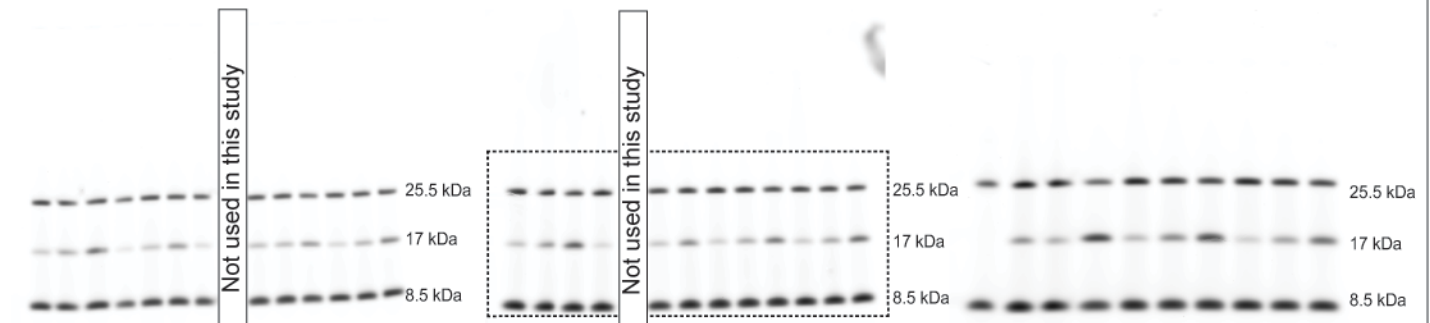

Supplement: NIHMS1637639-supplement-1637639_SourceData_ExtData_Fig4.pdf [file NIHMS1637639-supplement-1637639_SourceData_ExtData_Fig4.pdf]
