# Supplementary material
Source: PubMed Central journal article supplement (PMC7904580)

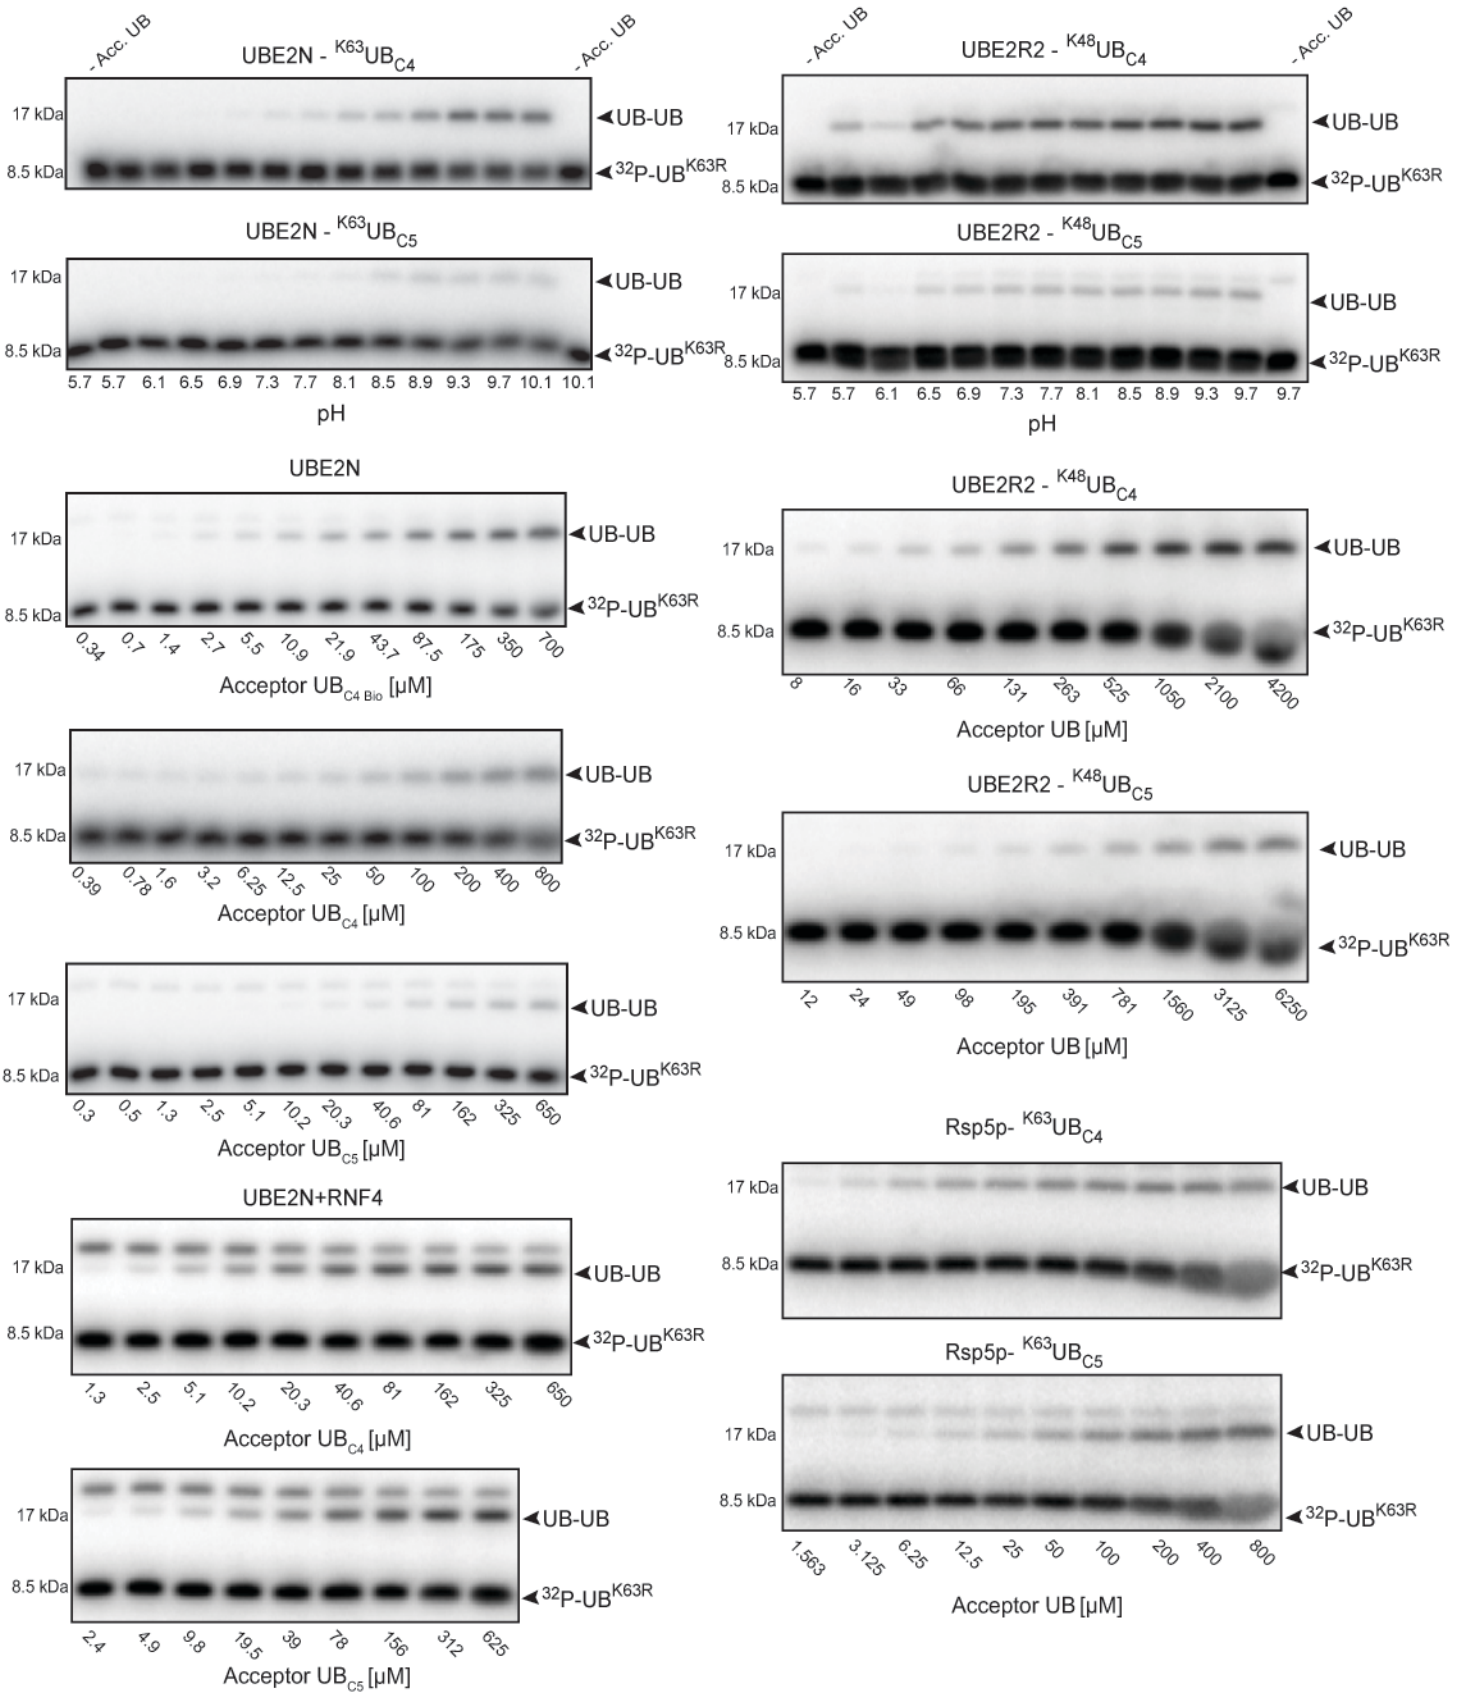

Table 1; Extended Data Figure 7b

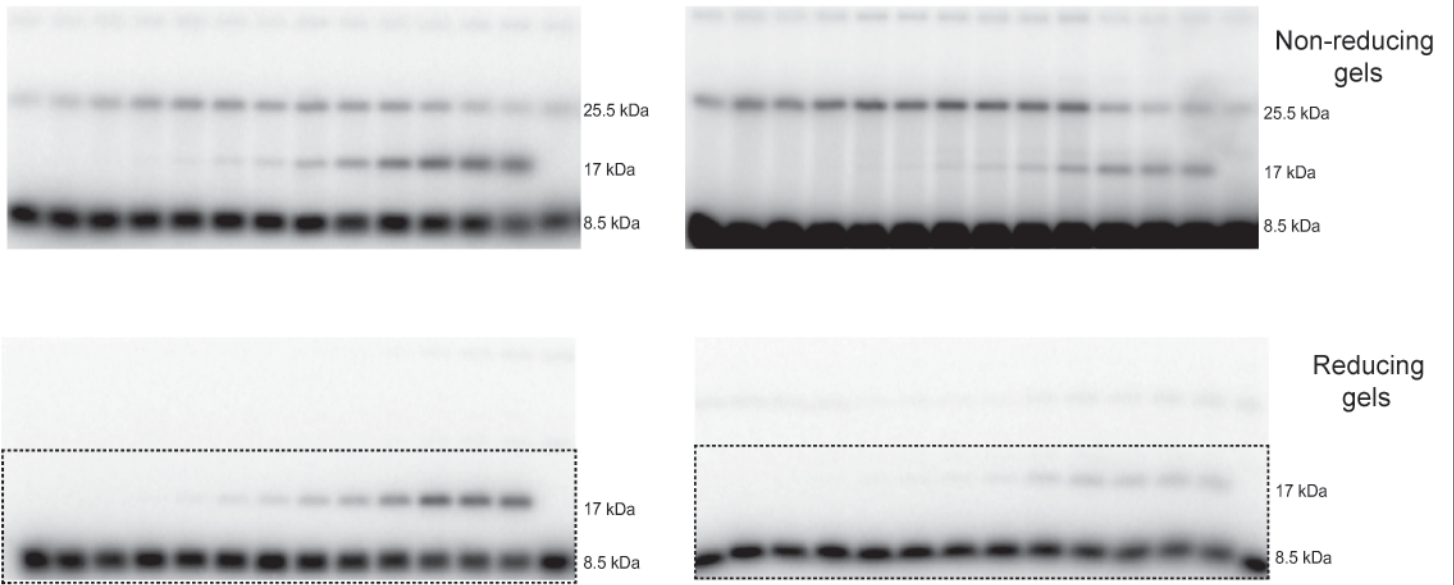

Table 1; Extended Data Figure 7c

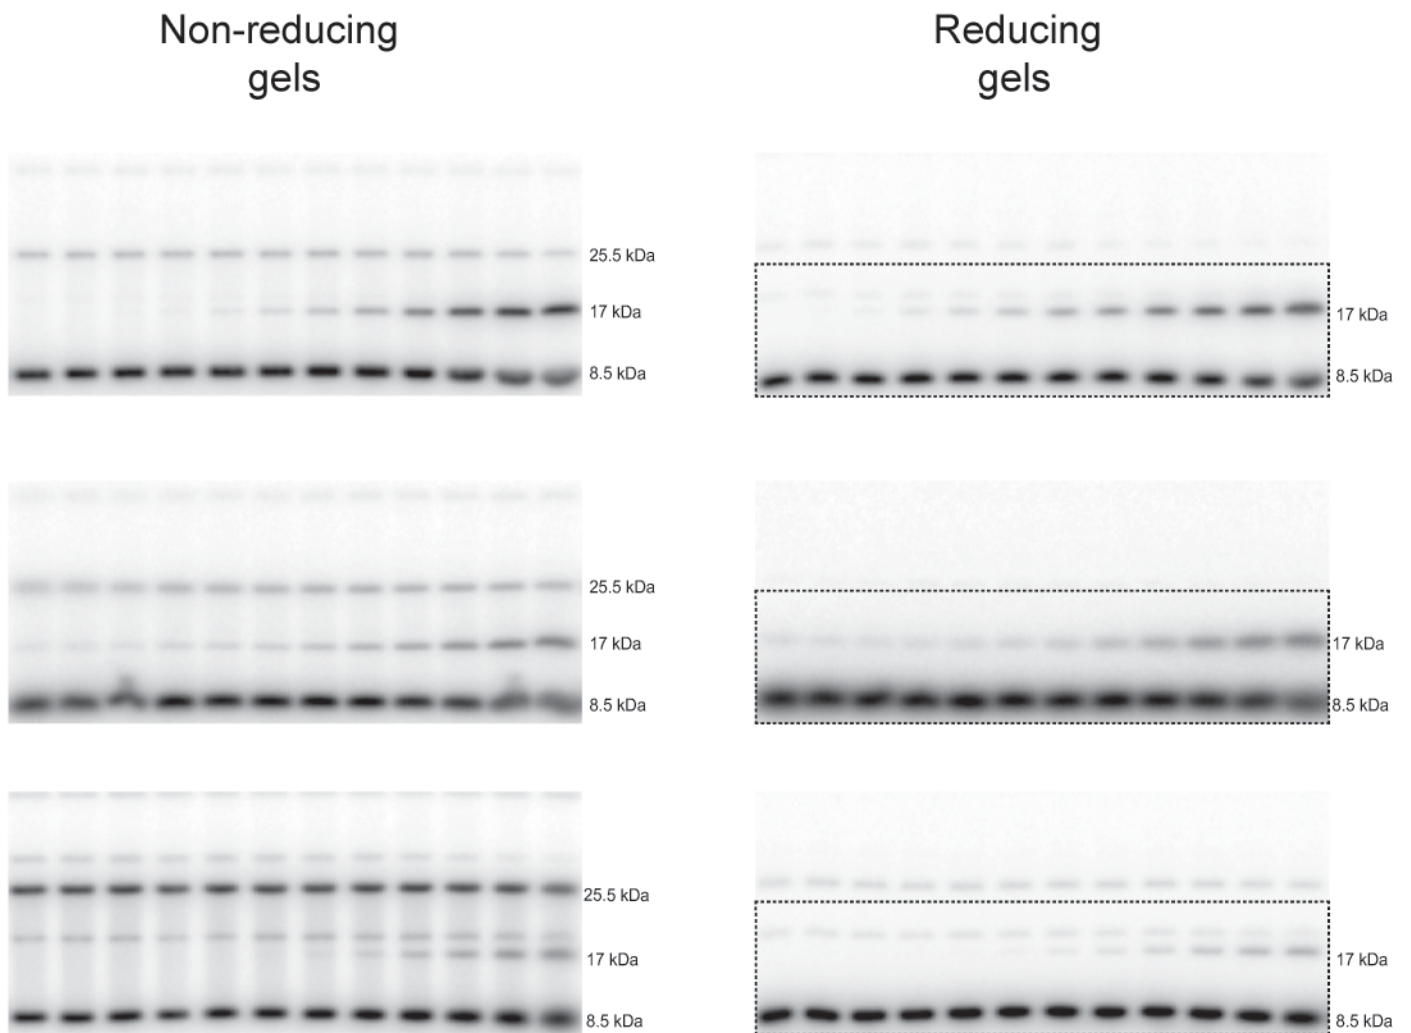

Table 1; Extended Data Figure 7d

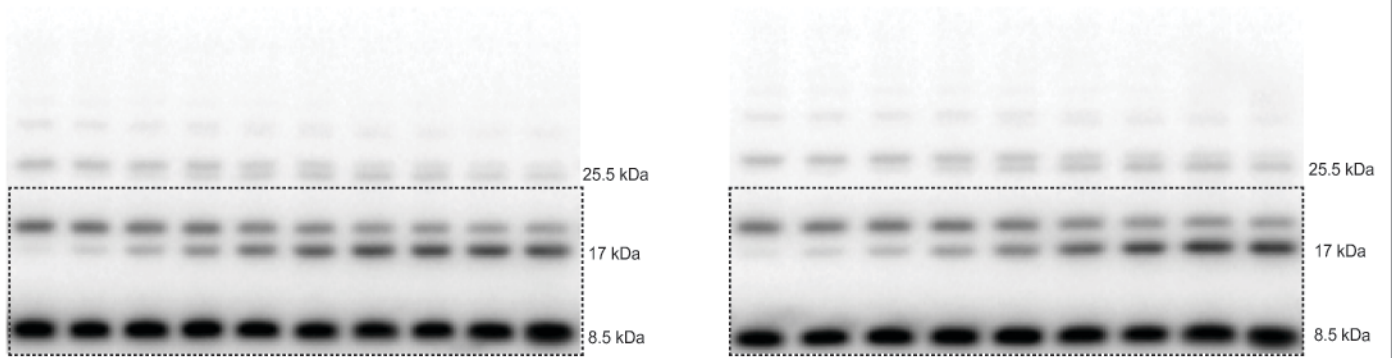

Table 1; Extended Data Figure 7e

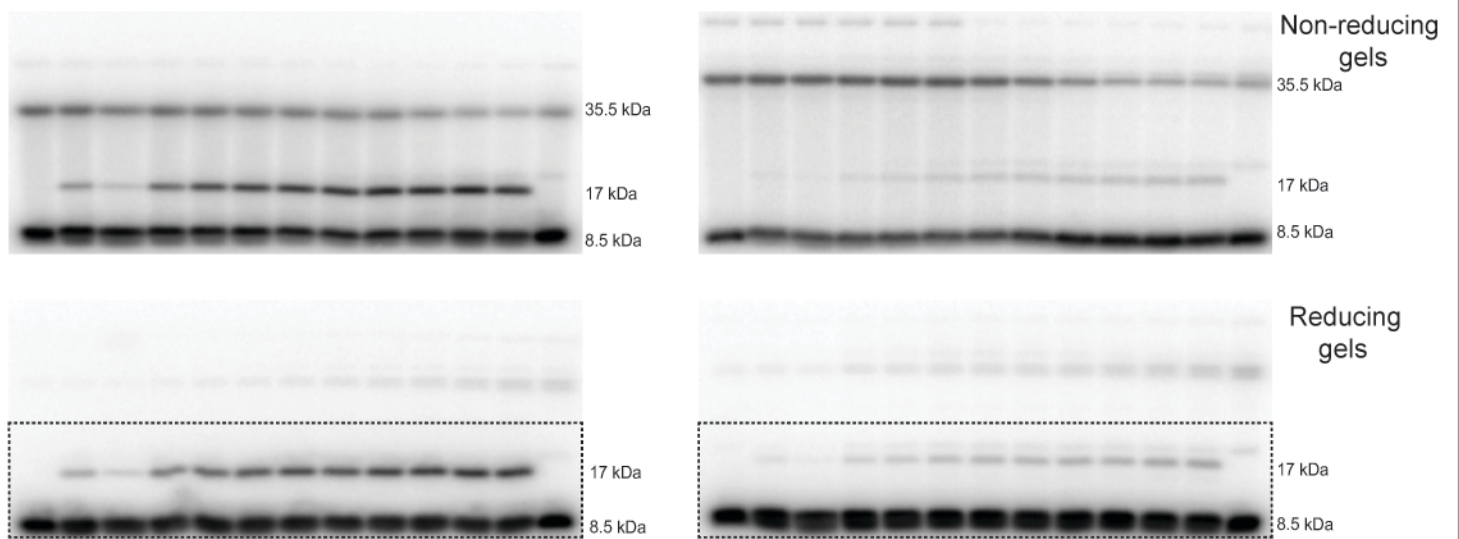

Table 1; Extended Data Figure 7f

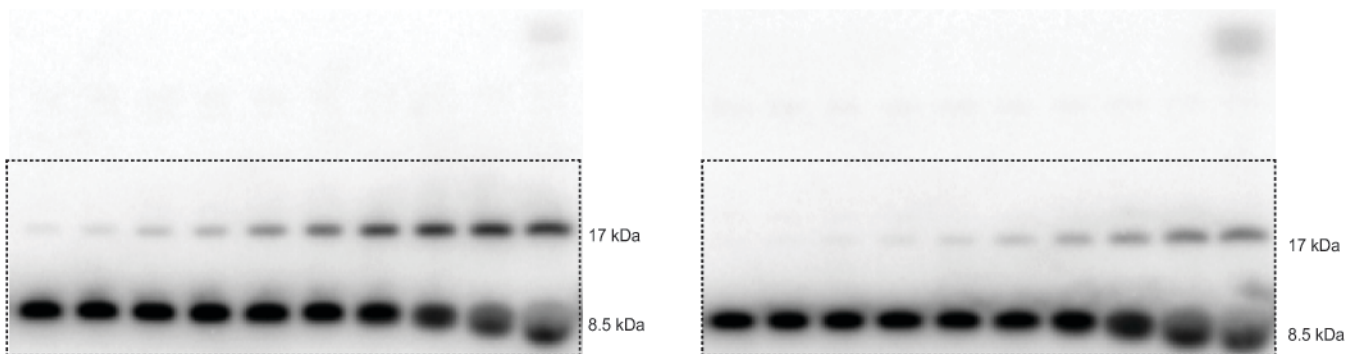

Table 1; Extended Data Figure 7g

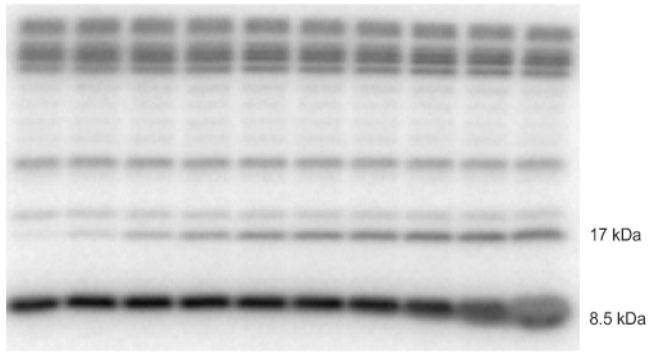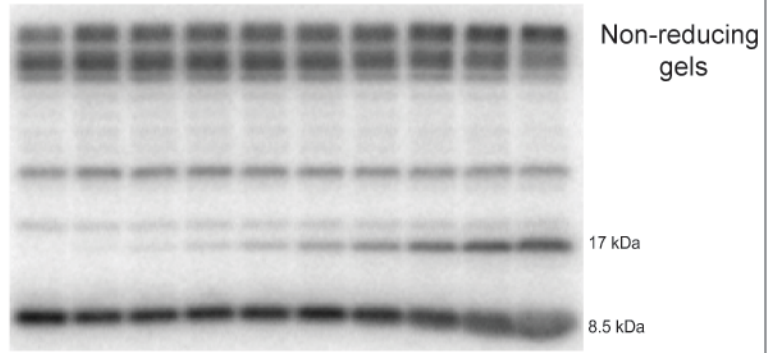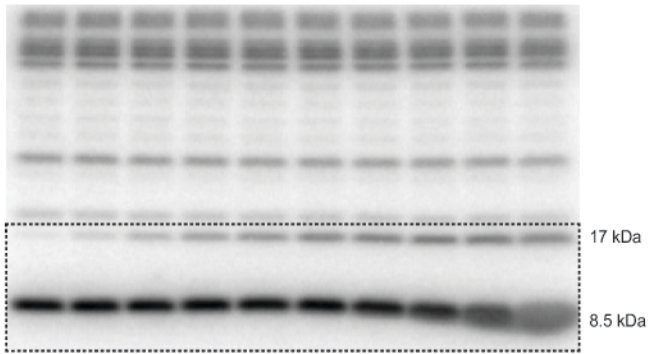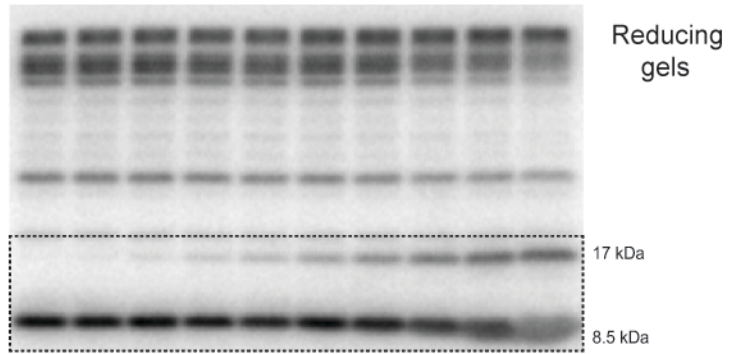

Supplement: NIHMS1637639-supplement-1637639_SourceData_Fig5.pdf [file NIHMS1637639-supplement-1637639_SourceData_Fig5.pdf]
