# Supplementary material
Source: PubMed Central journal article supplement (PMC7904580)

# Extended Data Figure 1a

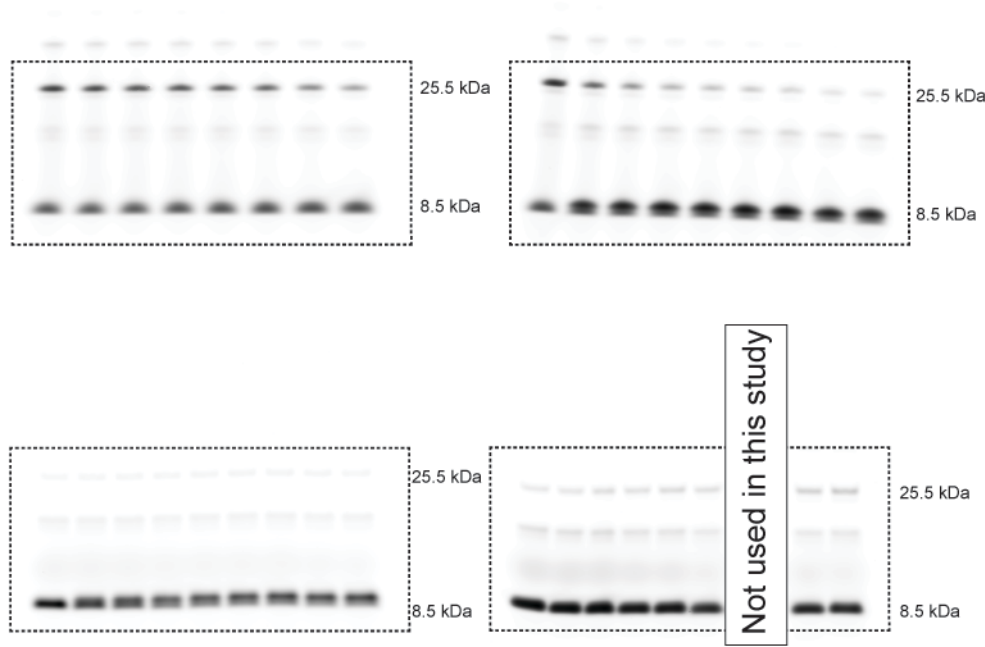

Supplement: NIHMS1637639-supplement-1637639_SourceData_ExtData_Fig1.pdf [file NIHMS1637639-supplement-1637639_SourceData_ExtData_Fig1.pdf]

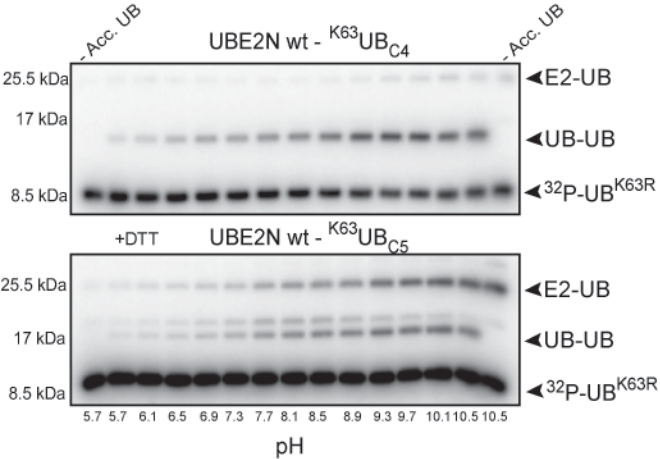

## Extended Data Figure 7a

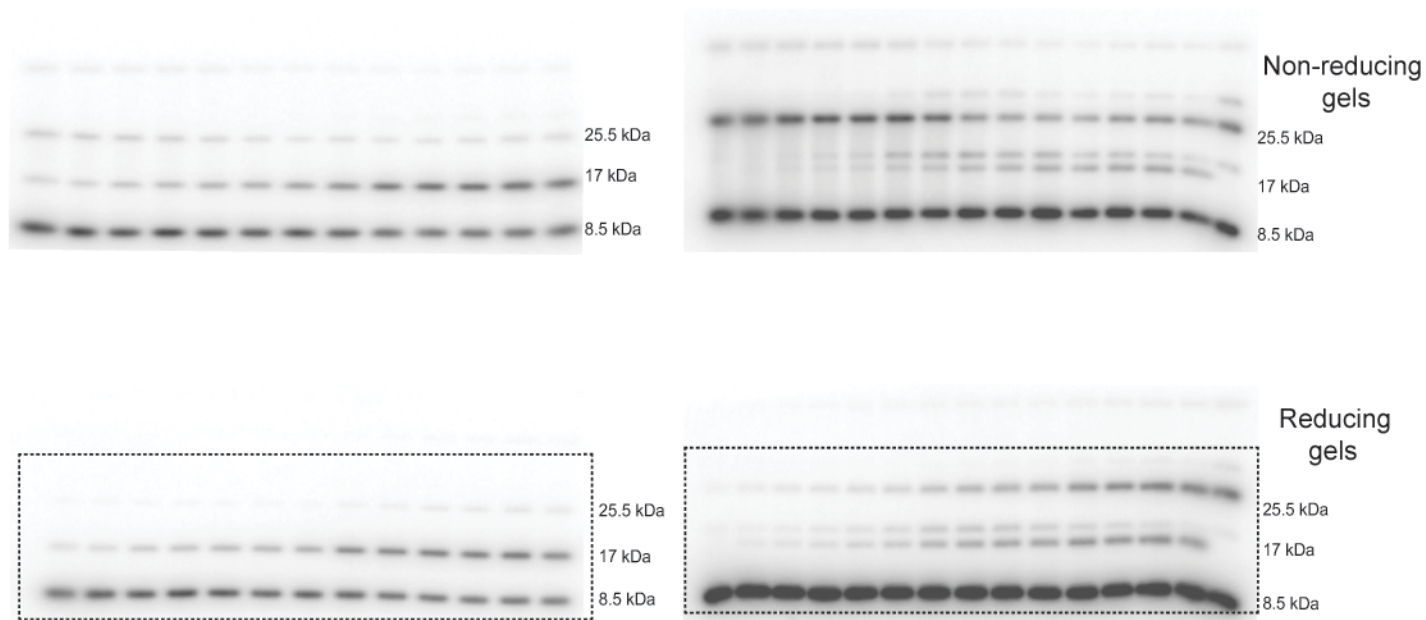

Supplement: NIHMS1637639-supplement-1637639_SourceData_ExtData_Fig7.pdf [file NIHMS1637639-supplement-1637639_SourceData_ExtData_Fig7.pdf]

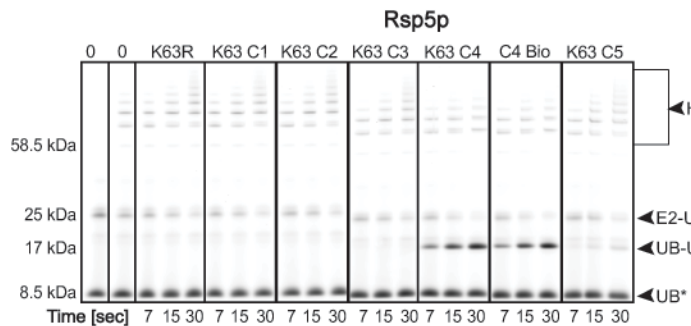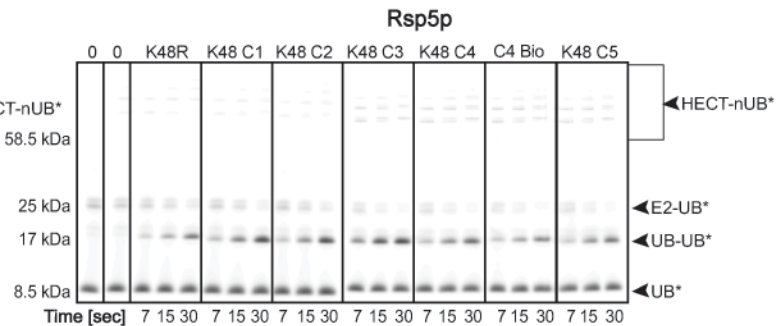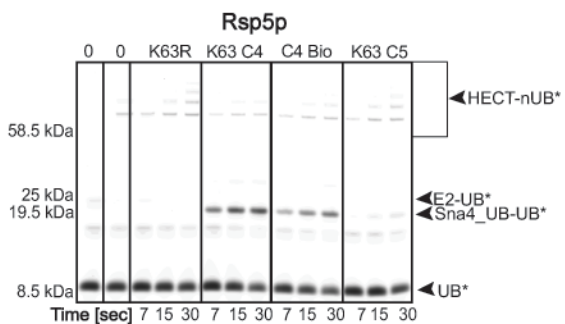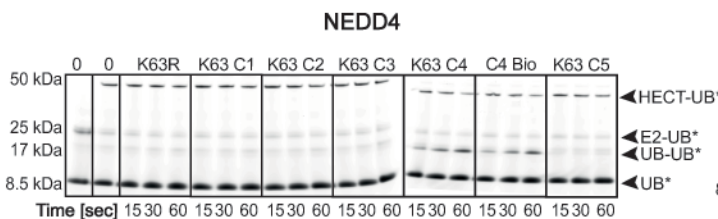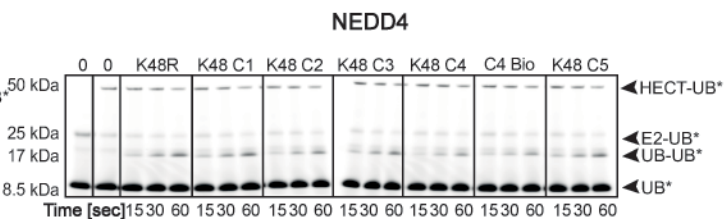

Figure 3a left panel

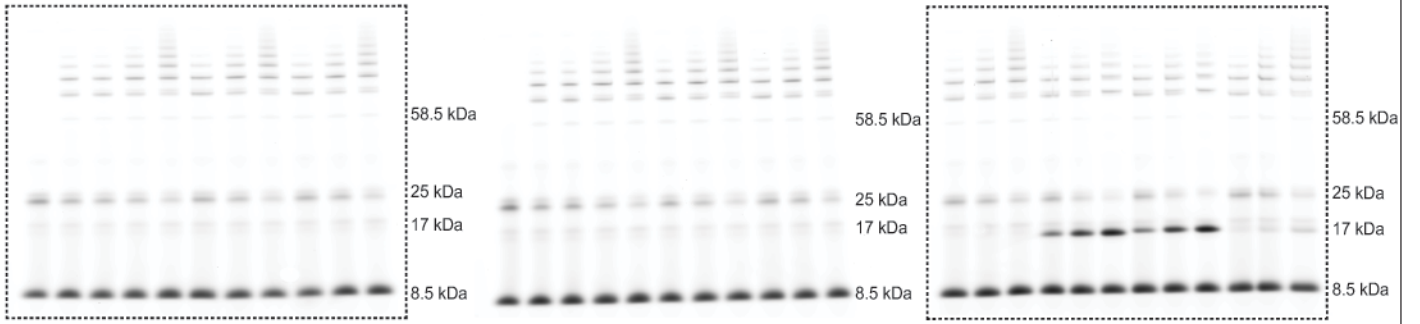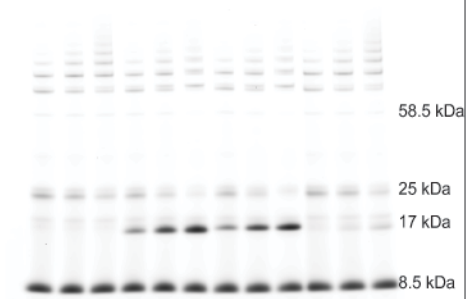

Figure 3a left panel

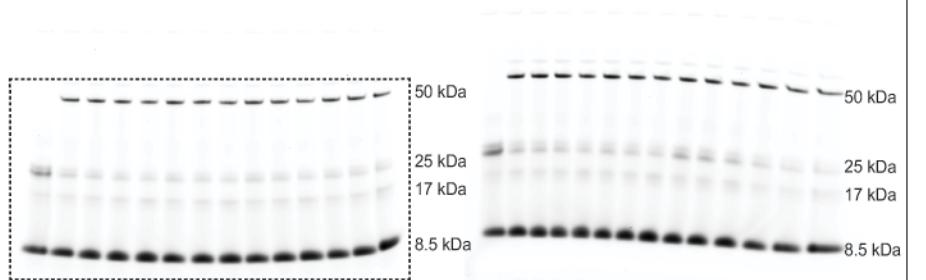

Figure 3b left panel

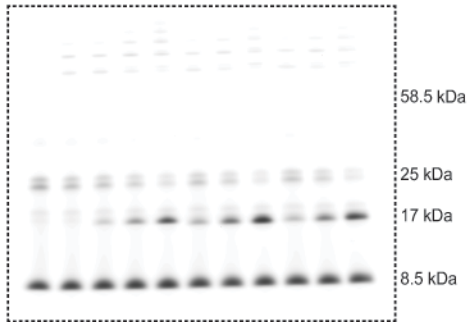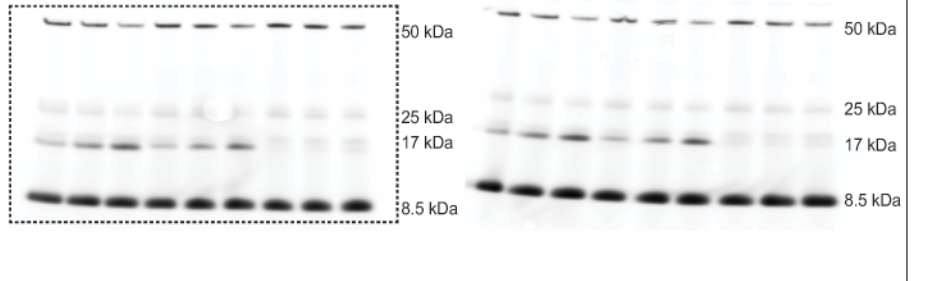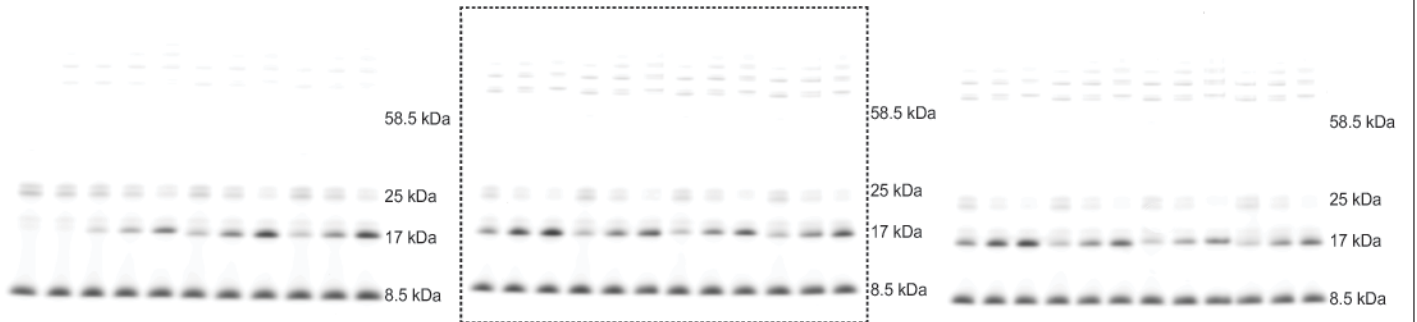

Figure 3b right panel

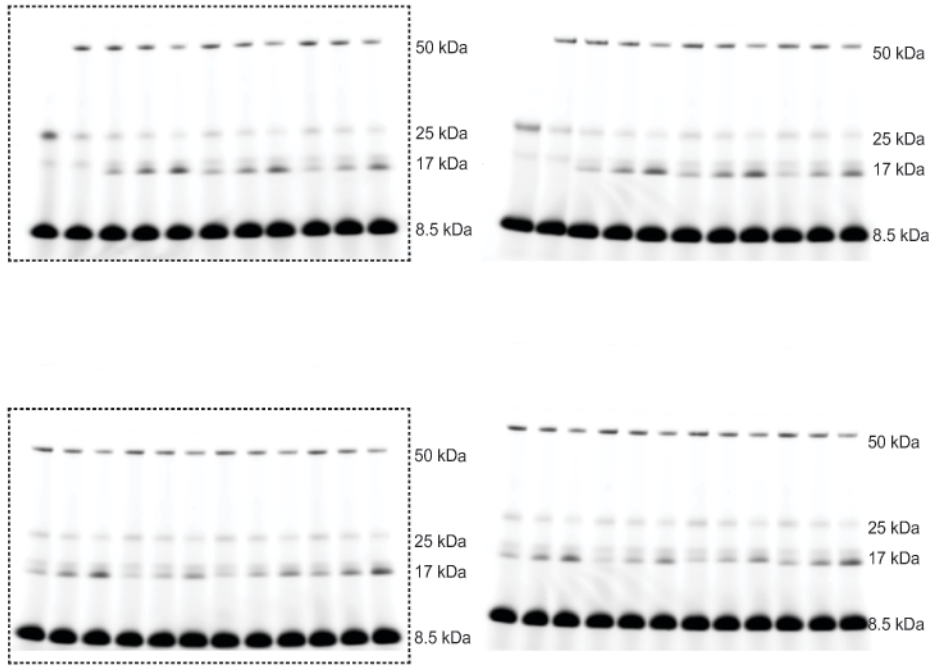

Figure 3c

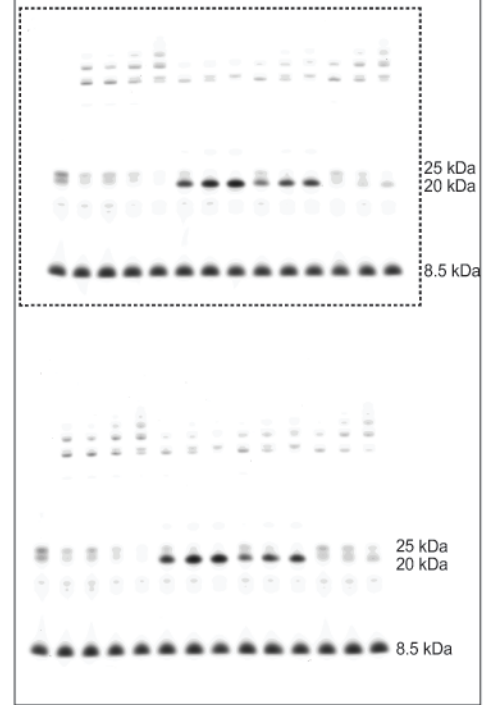

Supplement: NIHMS1637639-supplement-1637639_SourceData_Fig3.pdf [file NIHMS1637639-supplement-1637639_SourceData_Fig3.pdf]

Figure 4a

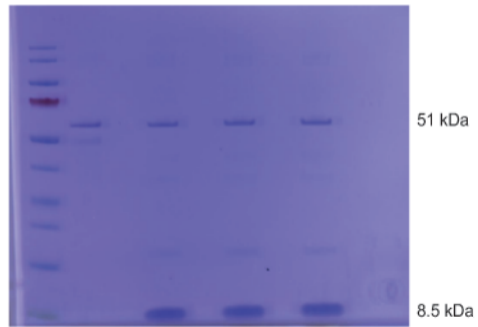

Figure 4b

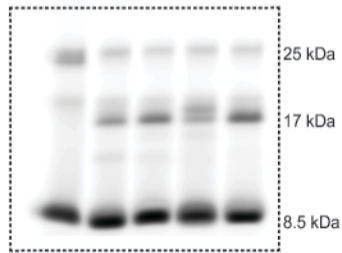

Figure 4c-d  
Extended Data Figure 5

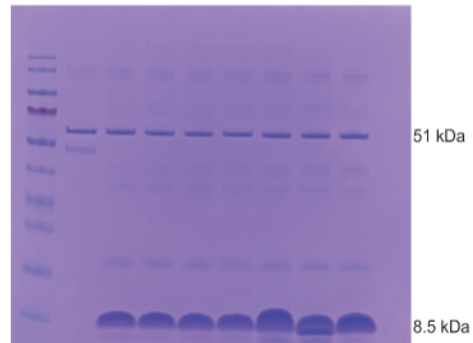

Supplement: NIHMS1637639-supplement-1637639_SourceData_Fig4.pdf [file NIHMS1637639-supplement-1637639_SourceData_Fig4.pdf]
